# Supplementary material for: Biological and glucocorticoids treatment impair the medium-term immunogenicity to SARS-CoV-2 mRNA vaccines in autoimmune inflammatory rheumatic diseases
Source: PubMed Central journal article supplement (PMC10768211; doi:10.1186/s40001-023-01620-7), 2024-01-05
Supplement: 40001_2023_1620_MOESM2_ESM.pdf [file 40001_2023_1620_MOESM2_ESM.pdf]

**Table S1.** Patients' characteristics by sample availability for analysis. The table presents the distribution of key parameters analyzed for all patients in our series (All, n = 157), those with pre- and post-third dose samples (Two samples available, n = 110), and those contributing to the study with an only sample collected before the third vaccine dose (One sample only, n = 47). For the later group, the table further provides descriptives for patients who failed to complete follow-up due to death (Exitus, n = 3), SARS-CoV-2 infection after the pre-third dose sample (COVID-19 infection, n = 17), and other reasons related to the study logistics (Logistics, n = 27). Cells display the medians and ranges for continuous variables (anti-S protein antibody titers and age), and the frequencies/percentages for categorical variables, including positivity for neutralizing antibodies (nABs) against diferents SARS-CoV-2 variants, such as: **Wild type**, **B.1.1.529** (Omicron), **B.1.1.7** (Alpha), **B.1.351** (Beta), **B.1.617.2** (Delta) and **P.1** (Gamma). The last column presents p-values from Mann-Whitney tests (continuous variables) of a Fisher's tests (categorical variables) comparing patients with and without second sample available for analyses. **SLE:** Systemic Lupus Erythematosus; **RA:** Rheumatoid Arthritis; **B27-AS:** HLA-B27 positive Ankylosing Spondylitis; **PSA:** Psoriatic Arthritis; **GCA:** Giant Cell Arteritis; **JAKi:** JAK inhibitors.

|                                         | All<br>n=157                         | Two samples<br>available<br>n=110<br>(70.1%) | One sample only (pre-third dose) |                             |                              |                         | P-value<br>(Two vs One<br>samples) |          |
|-----------------------------------------|--------------------------------------|----------------------------------------------|----------------------------------|-----------------------------|------------------------------|-------------------------|------------------------------------|----------|
|                                         |                                      |                                              | Exitus<br>n=3<br>(1.9%)          | COVID-19<br>n=17<br>(10.8%) | Logistics<br>n=27<br>(17.2%) | All<br>n=47<br>(29.9%)  |                                    |          |
| Anti-S-protein antibody (BAU/ml)        | 537.0<br>(0.2, 87880.0)              | 618.0<br>(0.0, 85340.0)                      | 233.0<br>(23.0, 1693.0)          | 295.0<br>(0.2, 8672.0)      | 332.0<br>(9.4, 87880.0)      | 295.0<br>(0.2, 87880.0) | 0.135461                           |          |
| Wild type - Positive                    | 78<br>(50.0%)                        | 61<br>(56.0%)                                | 1<br>(33.3%)                     | 8<br>(47.1%)                | 8<br>(29.6%)                 | 17<br>(36.2%)           | 0.035666                           |          |
| B.1.1.529 - Positive                    | 17<br>(10.9%)                        | 15<br>(13.8%)                                | 0<br>(0.0%)                      | 0<br>(0.0%)                 | 2<br>(7.4%)                  | 2<br>(4.3%)             | 0.097276                           |          |
| B.1.1.7 - Positive                      | 58<br>(37.2%)                        | 42<br>(38.5%)                                | 1<br>(33.3%)                     | 8<br>(47.1%)                | 7<br>(25.9%)                 | 16<br>(34.0%)           | 0.718381                           |          |
| B.1.351 - Positive                      | 44<br>(28.6%)                        | 34<br>(31.8%)                                | 1<br>(33.3%)                     | 4<br>(23.5%)                | 5<br>(18.5%)                 | 10<br>(21.3%)           | 0.245299                           |          |
| B.1.617.2 - Positive                    | 52<br>(33.3%)                        | 40<br>(36.7%)                                | 1<br>(33.3%)                     | 6<br>(35.3%)                | 5<br>(18.5%)                 | 12<br>(25.5%)           | 0.198702                           |          |
| P.1 - Positive                          | 47<br>(30.1%)                        | 36<br>(33.0%)                                | 2<br>(66.7%)                     | 5<br>(29.4%)                | 4<br>(14.8%)                 | 11<br>(23.4%)           | 0.258635                           |          |
| Sex - Female                            | 100<br>(63.7%)                       | 70<br>(63.6%)                                | 0<br>(0.0%)                      | 15<br>(88.2%)               | 15<br>(55.6%)                | 30<br>(63.8%)           | > 0.9999                           |          |
| Age at third dose of SARS-CoV-2 vaccine | 58.8<br>(33.5, 88.2)                 | 59.2<br>(33.5, 88.2)                         | 68.7<br>(61.0, 83.8)             | 56.8<br>(41.7, 85.0)        | 58.2<br>(43.4, 79.6)         | 58.3<br>(41.7, 85.0)    | 0.557594                           |          |
| Rheumatic<br>condition                  | LES                                  | 35<br>(22.3%)                                | 20<br>(18.2%)                    | 0<br>(0.0%)                 | 9<br>(52.9%)                 | 6<br>(22.2%)            | 15<br>(31.9%)                      | 0.010199 |
|                                         | AR                                   | 36<br>(22.9%)                                | 32<br>(29.1%)                    | 0<br>(0.0%)                 | 0<br>(0.0%)                  | 4<br>(14.8%)            | 4<br>(8.5%)                        |          |
|                                         | EA B27                               | 22<br>(14.0%)                                | 17<br>(15.5%)                    | 0<br>(0.0%)                 | 2<br>(11.8%)                 | 3<br>(11.1%)            | 5<br>(10.6%)                       |          |
|                                         | APSO                                 | 40<br>(25.5%)                                | 23<br>(20.9%)                    | 2<br>(66.7%)                | 5<br>(29.4%)                 | 10<br>(37.0%)           | 17<br>(36.2%)                      |          |
|                                         | VGV                                  | 24<br>(15.3%)                                | 18<br>(16.4%)                    | 1<br>(33.3%)                | 1<br>(5.9%)                  | 4<br>(14.8%)            | 6<br>(12.8%)                       |          |
| Treatmen type                           | Not treated or<br>Glucorticoids only | 25<br>(15.9%)                                | 18<br>(16.4%)                    | 0<br>(0.0%)                 | 3<br>(17.6%)                 | 4<br>(14.8%)            | 7<br>(14.9%)                       | 0.558644 |
|                                         | Immunosuppressive                    | 48<br>(30.6%)                                | 30<br>(27.3%)                    | 1<br>(33.3%)                | 9<br>(52.9%)                 | 8<br>(29.6%)            | 18<br>(38.3%)                      |          |
|                                         | Biological                           | 69<br>(43.9%)                                | 50<br>(45.5%)                    | 2<br>(66.7%)                | 4<br>(23.5%)                 | 13<br>(48.1%)           | 19<br>(40.4%)                      |          |
|                                         | JAKi                                 | 15<br>(9.6%)                                 | 12<br>(10.9%)                    | 0<br>(0.0%)                 | 1<br>(5.9%)                  | 2<br>(7.4%)             | 3<br>(6.4%)                        |          |
| Glucocorticoids use                     | 43<br>(27.4%)                        | 31<br>(28.2%)                                | 2<br>(66.7%)                     | 5<br>(29.4%)                | 5<br>(18.5%)                 | 12<br>(25.5%)           | 0.845809                           |          |
| mRNA-based<br>vaccine type              | mRNA-1273                            | 100<br>(63.7%)                               | 71<br>(64.5%)                    | 2<br>(66.7%)                | 11<br>(64.7%)                | 16<br>(59.3%)           | 29<br>(61.7%)                      | 0.856361 |
|                                         | BNT162b2                             | 57<br>(36.3%)                                | 39<br>(35.5%)                    | 1<br>(33.3%)                | 6<br>(35.3%)                 | 11<br>(40.7%)           | 18<br>(38.3%)                      |          |

**Supplementary Table S2.** Fold-changes (FC), bootstrap 95% confidence intervals (CI) and p-values for comparison of treatment groups within each time point of sample extraction. P-values are derived from a Mann-Whitney's test. **JAKi:** JAK inhibitors; **GCs:** Glucocorticoids.

|                                                     | Pre-3rd dose         |         | Post-3rd dose        |         |
|-----------------------------------------------------|----------------------|---------|----------------------|---------|
|                                                     | FC<br>[95%CI]        | P-value | FC<br>[95%CI]        | P-value |
| <b>Non-biological -<br/>Not treated or GCs only</b> | 1.13<br>[0.43, 2.52] | 0.8799  | 0.95<br>[0.39, 3.18] | 0.9830  |
| <b>Biological -<br/>Not treated or GCs only</b>     | 0.38<br>[0.14, 1.06] | 0.0132  | 0.70<br>[0.31, 2.46] | 0.5973  |
| <b>JAKi -<br/>Not treated or GCs only</b>           | 0.70<br>[0.15, 2.14] | 0.3565  | 0.56<br>[0.24, 2.26] | 0.4718  |
| <b>Biological -<br/>Non-biological</b>              | 0.34<br>[0.21, 0.72] | 0.0038  | 0.73<br>[0.39, 1.49] | 0.6837  |
| <b>JAKi -<br/>Non-biological</b>                    | 0.62<br>[0.18, 1.41] | 0.3329  | 0.59<br>[0.30, 1.47] | 0.2776  |
| <b>JAKi -<br/>Biological</b>                        | 1.85<br>[0.44, 3.85] | 0.3032  | 0.80<br>[0.33, 2.21] | 0.6304  |

**Supplementary Table S3.** Anti-S protein antibody levels and neutralizing antibodies positivity (nABs) by rheumatic condition group before (Pre-3rd dose) and after (Post-3rd dose) of a third dose of the SARS-CoV-2 mRNA-based vaccine. Cells show the medians and ranges of anti-S protein antibody titers, and the frequencies and percentages of positivity for nABs of diferents SARS-CoV-2 variants including: B.1.1.529 (Omicron), B.1.1.7 (Alpha), B.1.351 (Beta), B.1.617.2 (Delta) and P.1 (Gamma). The last row display the rheumatic conditions of patients represented in each treatment group and sample draw. P-values are derived from a Kruskal-Wallis tests comparing treatment groups within each sample time point. **SLE:** Systemic Lupus Erythematosus; **RA:** Rheumatoid Arthritis; **B27-AS:** HLA-B27 positive Ankylosing Spondylitis; **PSA:** Psoriatic Arthritis; **GCA:** Giant Cell Arteritis; **GCs:** Glucocorticoids; **JAKi:** JAK inhibitors.

|                                         | Pre-3rd dose      |                   |                   |                   |                   |         | Post-3rd dose        |                     |                         |                            |                    |         |
|-----------------------------------------|-------------------|-------------------|-------------------|-------------------|-------------------|---------|----------------------|---------------------|-------------------------|----------------------------|--------------------|---------|
|                                         | SLE<br>n=35       | RA<br>n=35        | B27-AS<br>n=22    | PSA<br>n=40       | GCA<br>n=24       | P-value | SLE<br>n=20          | RA<br>n=32          | B27-AS<br>n=17          | PSA<br>n=23                | GCA<br>n=18        | P-value |
| <b>Anti-S-protein antibody (BAU/ml)</b> | 486<br>[0, 83890] | 335<br>[0, 85340] | 671<br>[50, 4455] | 796<br>[19, 9567] | 239<br>[0, 87880] | 0.23968 | 11323<br>[38, 55080] | 6433<br>[0, 166760] | 11712<br>[2342, 137780] | 14547<br>[888.0, 112590.0] | 4311<br>[0, 74400] | 0.10945 |
| <b>Wild type - Positive</b>             | 21<br>(60.0%)     | 21<br>(60%)       | 19<br>(86.4%)     | 30<br>(75.0%)     | 12<br>(50%)       | 0.04812 | 19<br>(95.0%)        | 30<br>(93.8%)       | 17<br>(100%)            | 23<br>(100%)               | 16<br>(88.9%)      | 0.25326 |
| <b>B.1.1.529 - Positive</b>             | 6<br>(17.1%)      | 3<br>(8.6%)       | 1<br>(4.5%)       | 3<br>(7.5%)       | 4<br>(16.7%)      | 0.47496 | 11<br>(55.0%)        | 18<br>(56.2%)       | 9<br>(52.9%)            | 16<br>(69.6%)              | 6<br>(33.3%)       | 0.25326 |
| <b>B.1.1.7 - Positive</b>               | 18<br>(51.4%)     | 11<br>(31.4%)     | 8<br>(36.4%)      | 15<br>(37.5%)     | 6<br>(25.0%)      | 0.29535 | 18<br>(90.0%)        | 28<br>(87.5%)       | 17<br>(100.0%)          | 22<br>(95.7%)              | 15<br>(83.3%)      | 0.43294 |
| <b>B.1.351 - Positive</b>               | 15<br>(42.9%)     | 8<br>(23.5%)      | 6<br>(27.3%)      | 10<br>(25.0%)     | 5<br>(21.7%)      | 0.35435 | 17<br>(89.5%)        | 27<br>(87.1%)       | 15<br>(93.8%)           | 21<br>(91.3%)              | 14<br>(77.8%)      | 0.69225 |
| <b>B.1.617.2 - Positive</b>             | 17<br>(48.6%)     | 11<br>(31.4%)     | 7<br>(31.8%)      | 11<br>(27.5%)     | 6<br>(25.0%)      | 0.30516 | 18<br>(90.0%)        | 28<br>(87.5%)       | 17<br>(100.0%)          | 21<br>(91.3%)              | 15<br>(83.3%)      | 0.57836 |
| <b>P.1 - Positive</b>                   | 15<br>(42.9%)     | 12<br>(34.3%)     | 4<br>(18.2%)      | 10<br>(25.0%)     | 6<br>(25.0%)      | 0.28335 | 17<br>(85.0%)        | 27<br>(84.4%)       | 15<br>(88.2%)           | 20<br>(87.0%)              | 15<br>(83.3%)      | 0.9999  |

**Supplementary Table S4.** Comparison of anti-S protein antibody titers between rheumatic condition groups within each time point of sample extraction. Cells show Fold-changes (FC), 95% confidence intervals (CI) and p-values of the corresponding comparison. FCs and p-values were derived from a mixed-effects linear model where sex, age, rheumatic condition, treatment type, use of glucocorticoids, type of vaccine, sample type (pre- or post-3rd dose) and time from previous dose were included as fixed effects, as well as the interaction between: sex and sample type; treatment and sample type; rheumatic condition and sample type; use of glucocorticoids and sample type; time from 2nd and third vaccine dose and sample type; glucocorticoids use and treatment regimen; and glucocorticoids use and rheumatic condition. Individual effects were included as random effects in this model. **SLE:** Systemic Lupus Erythematosus; **RA:** Rheumatoid Arthritis; **B27-AS:** HLA-B27 positive Ankylosing Spondylitis; **PSA:** Psoriatic Arthritis; **GCA:** Giant Cell Arteritis; **JAKi:** JAK inhibitors; **GCs:** Glucocorticoids; **FC:** Fold-Change; **95%CI:** 95% confidence interval.

|                     | Pre-3rd dose          |         | Post-3rd dose         |         |
|---------------------|-----------------------|---------|-----------------------|---------|
|                     | FC<br>[95%CI]         | P-value | FC [95%CI]            | P-value |
| <b>RA - SLE</b>     | 3.31<br>[0.87, 12.60] | 0.0788  | 2.58<br>[0.64, 10.43] | 0.1844  |
| <b>B27-AS - SLE</b> | 3.21<br>[0.85, 12.13] | 0.0850  | 1.34<br>[0.33, 5.51]  | 0.6860  |
| <b>PSA - SLE</b>    | 8.27<br>[2.08, 32.80] | 0.0027  | 3.74<br>[0.85, 16.59] | 0.0821  |
| <b>GCA - SLE</b>    | 5.14<br>[1.15, 22.94] | 0.0317  | 1.31<br>[0.27, 6.50]  | 0.7373  |
| <b>B27-AS - RA</b>  | 0.97<br>[0.20, 4.60]  | 0.9695  | 0.52<br>[0.10, 2.81]  | 0.4469  |
| <b>PSA - RA</b>     | 2.50<br>[0.79, 7.93]  | 0.1208  | 1.45<br>[0.38, 5.52]  | 0.5830  |
| <b>GCA - RA</b>     | 1.55<br>[0.38, 6.36]  | 0.5406  | 0.51<br>[0.11, 2.39]  | 0.3933  |
| <b>PSA - B27-AS</b> | 2.57<br>[0.57, 11.60] | 0.2186  | 2.80<br>[0.53, 14.64] | 0.22353 |
| <b>GCA - B27-AS</b> | 1.60<br>[0.31, 8.28]  | 0.57438 | 0.98<br>[0.16, 6.05]  | 0.9840  |
| <b>GCA - PSA</b>    | 0.62<br>[0.15, 2.53]  | 0.5074  | 0.35<br>[0.07, 1.77]  | 0.2054  |

**Supplementary Table S5.** Increase of anti-S protein antibody levels after the third dose of the SARS-CoV-2 vaccine by treatment group. Cells show the Fold-changes (FC), bootstrap 95% confidence intervals (CI) and p-values comparing the the patients' titer levels after and before the administration of the third vaccine's dose. P-values are derived from a Wilcoxon test using only patients with both samples available. **JAKi:** JAK inhibitors; **GCs:** Glucocorticoids.

|                                | <b>FC<br/>[95%CI]</b>  | <b>P-value</b> |
|--------------------------------|------------------------|----------------|
| <b>Not treated or GCs only</b> | 16.89<br>[3.97, 50.67] | 0.0066         |
| <b>Non-biological</b>          | 11.26<br>[5.63, 19.19] | < 0.0001       |
| <b>Biological</b>              | 22.35<br>[8.78, 49.27] | < 0.0001       |
| <b>JAKi</b>                    | 10.51<br>[3.22, 32.23] | 0.02686        |

**Supplementary Table S6.** Increase of anti-S protein antibody levels after the third dose of the SARS-CoV-2 vaccine by rheumatic condition. Cells show the Fold-changes (FC), bootstrap 95% confidence intervals (CI) and p-values comparing the the patients' titer levels after and before the administration of the third vaccine's dose. P-values are derived from a Wilcoxon test using only patients with both samples available.

|                                                    | <b>FC<br/>[95%CI]</b>  | <b>P-value</b> |
|----------------------------------------------------|------------------------|----------------|
| <b>Systemic Lupus<br/>Erythematosus</b>            | 23.30<br>[7.21, 62.25] | 0.0010         |
| <b>Rheumatoid Arthritis</b>                        | 19.20<br>[6.71, 38.39] | < 0.0001       |
| <b>HLA-B27 positive<br/>Ankylosing Spondylitis</b> | 17.45<br>[6.99, 35.33] | < 0.0001       |
| <b>Psoriatic Arthritis</b>                         | 18.28<br>[7.89, 41.83] | < 0.0001       |
| <b>Giant Cell Arteritis</b>                        | 18.07<br>[6.28, 80.06] | 0.0373         |

**Supplementary Table S7.** Anti-S protein antibody levels by treatment group before (Pre-3rd dose) and after (Post-3rd dose) a third dose of the SARS-CoV-2 mRNA-based vaccine. Cells show the medians and ranges of anti-S protein antibody titers. P-values are derived from a Mann-Whitney test comparing treatment groups within each sample time point. **JAKi:** JAK inhibitors; **GCs:** Glucocorticoids.

|                                | Pre-3rd dose         |                    |         | Post-3rd dose           |                       |         |
|--------------------------------|----------------------|--------------------|---------|-------------------------|-----------------------|---------|
|                                | No GCs               | Gcs                | P-value | No GCs                  | Gcs                   | P-value |
| <b>Not treated or GCs only</b> | 1522<br>[152, 83890] | 300<br>[43, 20363] | 0.0272  | 11712<br>[2037, 55080]  | 3881<br>[1002, 74400] | 0.6272  |
| <b>Non-biological</b>          | 996<br>[14, 9567]    | 218<br>[16, 40700] | 0.0538  | 10338<br>[2246, 112590] | 11643<br>[433, 33200] | 0.8512  |
| <b>Biological</b>              | 419<br>[0, 12069]    | 72<br>[0, 87880]   | 0.0402  | 10890<br>[0, 137780]    | 1447<br>[0, 23022]    | 0.0124  |
| <b>JAKi</b>                    | 882<br>[34, 85340]   | 274<br>[43, 967]   | 0.2030  | 10229<br>[1479, 166760] | 4378<br>[393, 16823]  | 0.1495  |

**Supplementary Table S8** Comparison of anti-S protein antibody titers between users and non-users of Glucocorticoids (GCs) within each rheumatic condition and time point of sample extraction. Cells show Fold-changes (FC), 95% confidence intervals (CI) and p-values of the corresponding comparison. FCs and p-values were derived from a mixed-effects linear model where sex, age, rheumatic condition, treatment type, use of glucocorticoids, type of vaccine, sample type (pre- or post-3rd dose) and time from previous dose were included as fixed effects, as well as the interaction between: sex and sample type; treatment and sample type; rheumatic condition and sample type; use of glucocorticoids and sample type; time from 2nd and third vaccine dose and sample type; glucocorticoids use and treatment regimen; and glucocorticoids use and rheumatic condition. Individual effects were included as random effects in this model. **SLE:** Systemic Lupus Erythematosus; **RA:** Rheumatoid Arthritis; **B27-AS:** HLA-B27 positive Ankylosing Spondylitis; **PSA:** Psoriatic Arthritis; **GCA:** Giant Cell Arteritis; **JAKi:** JAK inhibitors; **GCs:** Glucocorticoids; **FC:** Fold-Change; **95%CI:** 95% confidence interval.

|            | Pre-3rd dose         |         | Post-3rd dose        |         |
|------------|----------------------|---------|----------------------|---------|
|            | FC<br>[95%CI]        | P-value | FC<br>[95%CI]        | P-value |
| <b>SLE</b> | 0.25<br>[0.05, 1.25] | 0.0911  | 0.39<br>[0.07, 2.20] | 0.2832  |
| <b>RA</b>  | 0.46<br>[0.11, 1.89] | 0.2837  | 0.71<br>[0.17, 2.91] | 0.6384  |
| <b>PSA</b> | 0.85<br>[0.17, 4.24] | 0.8435  | 1.31<br>[0.23, 7.47] | 0.7639  |
| <b>CGA</b> | 0.25<br>[0.04, 1.69] | 0.1563  | 0.39<br>[0.05, 2.82] | 0.3494  |



**Supplementary Table S9.** Positivity of neutralizing antibodies by glucocorticoids use in the overall series. Cells show, for different variants of the SARS-CoV-2, the absolute frequency and the percentage of positive immune response, and the p-value for the comparison of this frequencies derived from a exact Fisher's test. Variants of SARS-Cov-2 are: **B.1.1.529** (Omicron), **B.1.1.7** (Alpha), **B.1.351** (Beta), **B.1.617.2** (Delta) and **P.1** (Gamma). **GCs:** Glucocorticoids.

|                  | Pre-3rd dose   |               |         | Post-3rd dose  |               |         |
|------------------|----------------|---------------|---------|----------------|---------------|---------|
|                  | No GCs<br>N(%) | GCs<br>N(%)   | P-value | No GCs<br>N(%) | GCs<br>N(%)   | P-value |
| <b>Wild type</b> | 84<br>(73.7%)  | 19<br>(45.2%) | 0.0012  | 77<br>(97.5%)  | 28<br>(90.3%) | 0.1349  |
| <b>B.1.1.529</b> | 12<br>(10.5%)  | 5<br>(11.9%)  | 0.7780  | 47<br>(59.5%)  | 13<br>(41.9%) | 0.1359  |
| <b>B.1.1.7</b>   | 47<br>(41.2%)  | 11<br>(26.2%) | 0.0955  | 76<br>(96.2%)  | 24<br>(77.4%) | 0.0050  |
| <b>B.1.351</b>   | 37<br>(32.7%)  | 7<br>(17.1%)  | 0.0698  | 71<br>(93.4%)  | 23<br>(74.2%) | 0.0097  |
| <b>B.1.617.2</b> | 43<br>(37.7%)  | 9<br>(21.4%)  | 0.0588  | 75<br>(94.9%)  | 24<br>(77.4%) | 0.0109  |
| <b>P.1</b>       | 38<br>(33.3%)  | 9<br>(21.4%)  | 0.1726  | 71<br>(89.9%)  | 23<br>(74.2%) | 0.0670  |

**Supplementary Table S10.** Positivity of neutralizing antibodies by glucocorticoids use in patients under biological treatment. Cells show, for different variants of the SARS-CoV-2, the absolute frequency and the percentage of positive immune response, and the p-value for the comparison of this frequencies derived from an exact Fisher's test. Variants of SARS-Cov-2 are: **B.1.1.529** (Omicron), **B.1.1.7** (Alpha), **B.1.351** (Beta), **B.1.617.2** (Delta) and **P.1** (Gamma). **GCs:** Glucocorticoids.

|                  | Pre-3rd dose   |              |         | Post-3rd dose  |              |         |
|------------------|----------------|--------------|---------|----------------|--------------|---------|
|                  | No GCs<br>N(%) | GCs<br>N(%)  | P-value | No GCs<br>N(%) | GCs<br>N(%)  | P-value |
| <b>Wild type</b> | 34<br>(60.7%)  | 3<br>(25.0%) | 0.0299  | 40<br>(95.2%)  | 5<br>(62.5%) | 0.0242  |
| <b>B.1.1.529</b> | 2<br>(3.6%)    | 1<br>(8.3%)  | 0.4469  | 24<br>(57.1%)  | 1<br>(12.5%) | 0.0488  |
| <b>B.1.1.7</b>   | 17<br>(30.4%)  | 2<br>(16.7%) | 0.4866  | 40<br>(95.2%)  | 4<br>(50.0%) | 0.0039  |
| <b>B.1.351</b>   | 10<br>(18.2%)  | 2<br>(16.7%) | 0.9999  | 37<br>(90.2%)  | 4<br>(50.0%) | 0.0171  |
| <b>B.1.617.2</b> | 14<br>(25.0%)  | 2<br>(16.7%) | 0.7171  | 39<br>(92.9%)  | 4<br>(50.0%) | 0.0085  |
| <b>P.1</b>       | 12<br>(21.4%)  | 3<br>(25.0%) | 0.7188  | 39<br>(92.9%)  | 3<br>(37.5%) | 0.0012  |

**Table S11.** Distribution of biological treatments by use of Glucocorticoids (GCs).

|                              | <b>No GCs</b> | <b>GCs</b> |
|------------------------------|---------------|------------|
| <b>anti-TFN</b>              | 21 (87.5%)    | 3 (12.5%)  |
| <b>Baricitinib</b>           | 0 (0.0%)      | 1 (100.0%) |
| <b>Belimumab</b>             | 3 (75.0%)     | 1 (25.0%)  |
| <b>IL-17</b>                 | 17 (94.4%)    | 1 (5.6%)   |
| <b>Mycophenolate mofetil</b> | 2 (100.0%)    | 0 (0.0%)   |
| <b>Rituximab</b>             | 4 (100.0%)    | 0 (0.0%)   |
| <b>Sulfasalazine</b>         | 0 (0.0%)      | 1 (100.0%) |
| <b>Tocilizumab</b>           | 10 (62.5%)    | 6 (37.5%)  |
| <b>Ustekinumab</b>           | 1 (50.0%)     | 1 (50.0%)  |
